# Supplementary material for: Third BNT162b2 mRNA SARS-CoV-2 Vaccine Dose Significantly Enhances Immunogenicity in Recipients of Allogeneic Hematopoietic Stem Cell Transplantation
Source: MDPI journal article supplement (doi:10.3390/vaccines11040775), 2023-03-31
Supplement: s1 [file s1]

Figure S1. Cellular response gating technique and analysis

A.

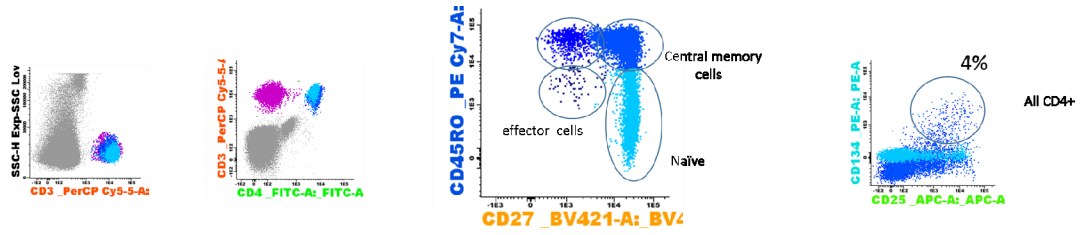

B.

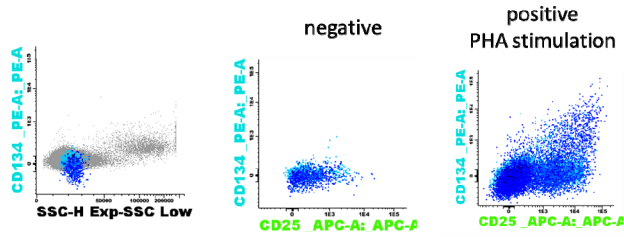

C.

SARS-CoV-2 Prot\_s Complete  
(surface glycoprotein "spike protein")

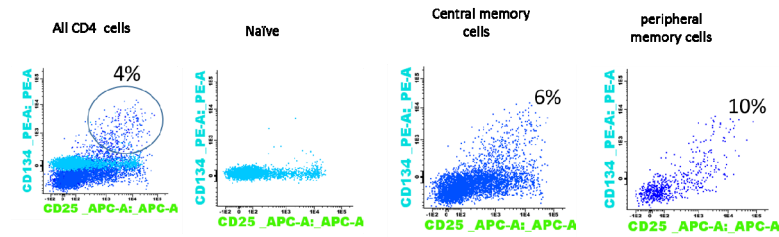

A) CD3 T lymphocytes were gated. CD4 T helper lymphocytes were gated out of the CD3 population. CD4 sub-populations were gated according to their expression of CD45RO and CD27: Naïve cells (CD45RO<sup>-</sup>, CD27<sup>+</sup>), T central memory cells (CD45RO<sup>+</sup>, CD27<sup>+</sup>), T effector memory (CD45RO<sup>+</sup>, CD27<sup>-</sup>), T effectors (CD45RO<sup>-</sup>, CD27<sup>-</sup>).<sup>41</sup> B-C) To find the frequency of activated cells to stimulation, each subpopulation was gated for CD134<sup>+</sup> and CD25<sup>+</sup> double expresser cells.<sup>42</sup> B) stimulation with PHA. C) stimulation with the spike-protein.

Table S1. Cellular response values

|                                          | <b>Responders (<math>\geq 150</math> AU/ml); n=12</b> | <b>Non-responders (<math>&lt; 150</math> AU/ml) ; n=18</b> | <b>Healthy controls; n=7</b> | <b>P value</b>                                         |
|------------------------------------------|-------------------------------------------------------|------------------------------------------------------------|------------------------------|--------------------------------------------------------|
| <b>T cells (CD3+)</b>                    | 59 [50.25-64.75]                                      | 72 [62.25-81.5]                                            | 75 [73-79]                   | <b>P1=0.007</b><br><b>P2=0.013</b><br>P3=0.071         |
| <b>T helper (CD4+)</b>                   | 44 [35-53]                                            | 25.5 [17-30.75]                                            | 64 [61-71]                   | <b>P=0.002</b><br>P2=0.078<br><b>P3&lt;0.001</b>       |
| <b>% Activated cells (CD134+, CD25+)</b> |                                                       |                                                            |                              |                                                        |
| <b>Negative control</b>                  | 0                                                     | 0                                                          | 0                            | 0                                                      |
| <b>Positive control (PHA)</b>            | 23.5 [18.25-38.75]                                    | 23 [12-31.5]                                               | 15 [10-24]                   | P=0.46<br>P=0.25                                       |
| <b>Test samples (s-protein)</b>          | 2 [1.13-7.25]                                         | 0 [0-0.95]                                                 | 1.3 [0.7-2]                  | <b>P=0.001</b><br>P2=0.29<br><b>P3&lt;0.001</b>        |
| <b>Naïve CD4 T cells</b>                 | 22 [6.75-31.50]                                       | 5 [3.75-11.25]                                             | 40 [19-46]                   | <b>P=0.007</b><br>P2=0.15<br><b>P3&lt;0.001</b>        |
| <b>% Activated cells (CD134+, CD25+)</b> |                                                       |                                                            |                              |                                                        |
| <b>Negative control</b>                  | 0                                                     | 0                                                          | 0                            | 0                                                      |
| <b>Positive control (PHA)</b>            | 0                                                     | 0                                                          | 4 [0-5]                      | <b>P2=0.017</b><br><b>P3=0.001</b>                     |
| <b>Test samples (s-protein)</b>          | 0                                                     | 0                                                          | 0                            | 0                                                      |
| <b>Central memory CD4 T cells</b>        | 55 [45.5-70.5]                                        | 47 [39.25-55.75]                                           | 48 [36-63]                   | P1=0.09<br>P2=0.22                                     |
| <b>% Activated cells (CD134+, CD25+)</b> |                                                       |                                                            |                              |                                                        |
| <b>Negative control</b>                  | 0                                                     | 0                                                          | 0                            | 0                                                      |
| <b>Positive control (PHA)</b>            | 32.5 [17-42.50]                                       | 25 [11.5-35.25]                                            | 25 [9-28]                    | P1=0.20<br>P2=0.25                                     |
| <b>Test samples (s-protein)</b>          | 3 [2-7.75]                                            | 0 [0-1.53]                                                 | 1.5 [1-6]                    | <b>P=0.001</b><br>P2=0.30<br><b>P3&lt;0.001</b>        |
| <b>Effector memory CD4 T cells</b>       | 15 [8.25-24.25]                                       | 33 [24-44.25]                                              | 14 [5-15]                    | <b>P=0.008</b><br><b>P2=0.010</b><br><b>P3=0.001</b>   |
| <b>% Activated cells (CD134+, CD25+)</b> |                                                       |                                                            |                              |                                                        |
| <b>Negative control</b>                  | 0                                                     | 0                                                          | 0                            | 0                                                      |
| <b>Positive control (PHA)</b>            | 28 [23.75-55.5]                                       | 26.5 [13.25-31.25]                                         | 22 [14-37]                   | P=0.13<br>P=0.23                                       |
| <b>Test samples (s-protein)</b>          | 3 [1-9.75]                                            | 0 [0-0.25]                                                 | 3 [2-10]                     | <b>P=0.001</b><br><b>P2=0.58</b><br><b>P3&lt;0.001</b> |
| <b>Effector CD4 T cells</b>              | 1.5 [1-3]                                             | 5.5 [3-8.25]                                               | 1 [0-3]                      | <b>P=0.004</b><br><b>P2=0.007</b><br><b>P3=0.002</b>   |
| <b>% Activated cells (CD134+, CD25+)</b> |                                                       |                                                            |                              |                                                        |
| <b>Negative control</b>                  | 0                                                     | 0                                                          | 0                            |                                                        |
| <b>Positive control (PHA)</b>            | 0                                                     | 0                                                          | 0                            |                                                        |
| <b>Test samples (s-protein)</b>          | 0                                                     | 0                                                          | 0                            |                                                        |

Frequencies are presented as percent of positive cells. Median and range [..] are presented. P1 = responders vs. non-responders, P2 = responders vs. healthy controls, P3=non-responders vs. healthy controls.

Table S2. Antibody titer values after the second vaccine dose in responders and non-responders for the entire cohort

| <b>Antibody titer (AU/ml)<br/>after vaccine second dose,<br/>median [range]</b> | <b>Responders* (<math>\geq 150</math><br/>AU/ml)</b> | <b>Non-responders*<br/>(<math>&lt; 150</math> AU/ml)</b> | <b>P value</b> |
|---------------------------------------------------------------------------------|------------------------------------------------------|----------------------------------------------------------|----------------|
| <b>1 month</b>                                                                  | 2917 [401-40000], N=14                               | 10 [0-148], N=17                                         | $< 0.0001$     |
| <b>3 months</b>                                                                 | 1628.5 [33-40000], N=17                              | 5 [0-133], N=20                                          | $< 0.0001$     |
| <b>6 months</b>                                                                 | 1612.5 [78-40000], N=45                              | 3 [0-135], N=17                                          | $< 0.0001$     |
| <b>1 month post 3<sup>rd</sup> dose</b>                                         | 40000 [881-40000], N=30                              | 715 [0-17879], N=19                                      | $< 0.0001$     |
| <b>3 month post 3<sup>rd</sup> dose</b>                                         | 8524 [76-40000], N=15                                | 1030 [0-4560], N=16                                      | $< 0.0001$     |

Response to the second vaccine dose.

N - Number of patients with available data.

Table S3. Multivariate analysis for response to the second vaccine dose

| <b>Response (<math>\geq 150</math> AU/ml)</b> |            |                    |               |
|-----------------------------------------------|------------|--------------------|---------------|
| <b>Predictors</b>                             | Odds ratio | 95% CI             | P value       |
| <b>Gender [female]</b>                        | 8.551      | 1.931 - 53.65      | <b>0.0095</b> |
| <b>Age</b>                                    | 0.9721     | 0.9159 - 1.026     | 0.3176        |
| <b>Donor [haplo]</b>                          | 0.05442    | 0.0005306 - 2.546  | 0.1650        |
| <b>Donor [MRD]</b>                            | 3.901      | 0.3243 - 70.24     | 0.3124        |
| <b>Disease status [CR]</b>                    | 1.599      | 0.2946 - 8.672     | 0.5798        |
| <b>Anti CD20 [yes]</b>                        | 0.03284    | 0.0006897 - 0.5525 | <b>0.0359</b> |
| <b>ATG [no]</b>                               | 0.8126     | 0.05485 - 11.84    | 0.8761        |
| <b>Vaccine timing [int]</b>                   | 2.597      | 0.4056 - 19.06     | 0.3212        |
| <b>Vaccine timing [late]</b>                  | 11.59      | 1.771 - 104.1      | <b>0.0158</b> |
| <b>Steroids Rx at vaccine [no]</b>            | 3.610      | 0.7187 - 20.17     | 0.1220        |

Haplo – haploidentical donor, MRD – matched related donor, CR – complete remission, int - intermediate time period after transplant (>6 months and < 12 months), late - intermediate time period after transplant (> 12 months). Multiple logistic regression.
